# Supplementary material for: Robust Superhydrophobic Coating with Mullite Fiber Framework
Source: MDPI journal article supplement (doi:10.3390/coatings12071037), 2022-07-21
Supplement: s1 [file s1]

Archive with 1 entries (1 files):
- coatings-1811188-supplementary.pdf
