# Supplementary material for: Robust Superhydrophobic Coating with Mullite Fiber Framework
Source: MDPI journal article supplement (doi:10.3390/coatings12071037), 2022-07-21
Supplement: s1 [file s1 › coatings-1811188-supplementary.pdf]

## Article

# Robust Superhydrophobic Coating with Mullite Fiber Framework

Wensheng Zhong<sup>1</sup>, Shilin Hu<sup>2</sup>, Manyuan Wu<sup>1</sup>, Bichen Xiong<sup>1</sup>, Qiaowen Liu<sup>1</sup>, Qing Jia<sup>2</sup>, Yaming Liu<sup>2</sup> and Hongwei Liao<sup>1,\*</sup>

<sup>1</sup> School of Materials Science and Engineering, Changsha University of Science & Technology, Changsha 410014, China; zws022033@163.com (W.Z.); 15225171791@163.com (M.W.); xiobc0519@163.com (B.X.); [a2864496045@163.com](mailto:a2864496045@163.com) (Q.L.)

<sup>2</sup> China Institute of Atomic Energy, Beijing 102400, China; husl@ciae.ac.cn (S.H.); iampanda666@163.com (Q.J.); liuym83@163.com (Y.L.)

\* Correspondence: 1870350655@csust.edu.cn

**Citation:** Zhong, W.; Hu, S.; Wu, M.; Xiong, B.; Liu, Q.; Jia, Q.; Liu, Y.; Liao, H. Robust Superhydrophobic Coating with Mullite Fiber Framework. *Coatings* **2022**, *12*, 1037. <https://doi.org/10.3390/coatings12071037>

Academic Editor(s): Atif Hussain

Received: 26 June 2022

Accepted: 20 July 2022

Published: date

**Publisher's Note:** MDPI stays neutral with regard to jurisdictional claims in published maps and institutional affiliations.

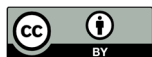

**Copyright:** © 2022 by the authors. Submitted for possible open access publication under the terms and conditions of the Creative Commons Attribution (CC BY) license (<https://creativecommons.org/licenses/by/4.0/>).

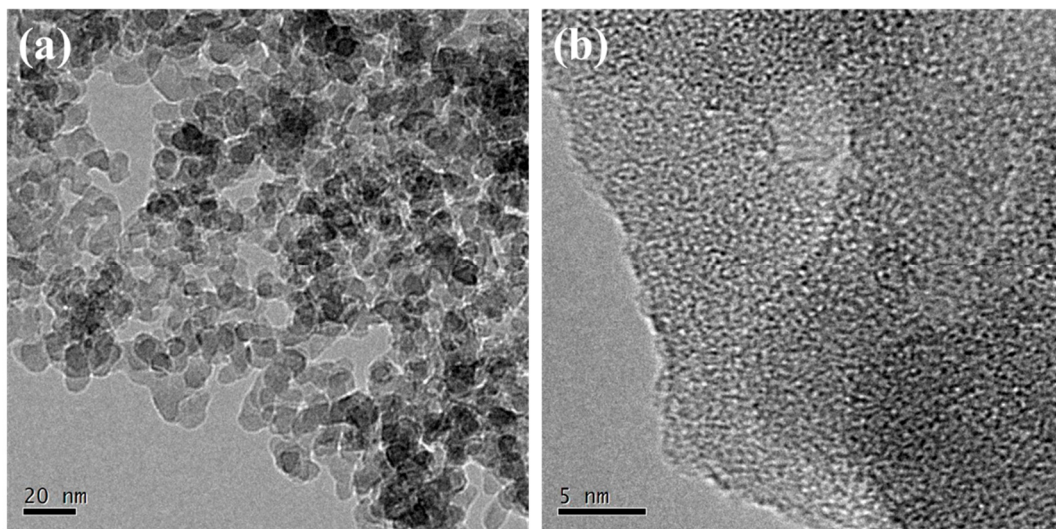

**Figure S1.** (a) TEM morphology of nanoparticles; (b) HR-TEM of nanoparticles.

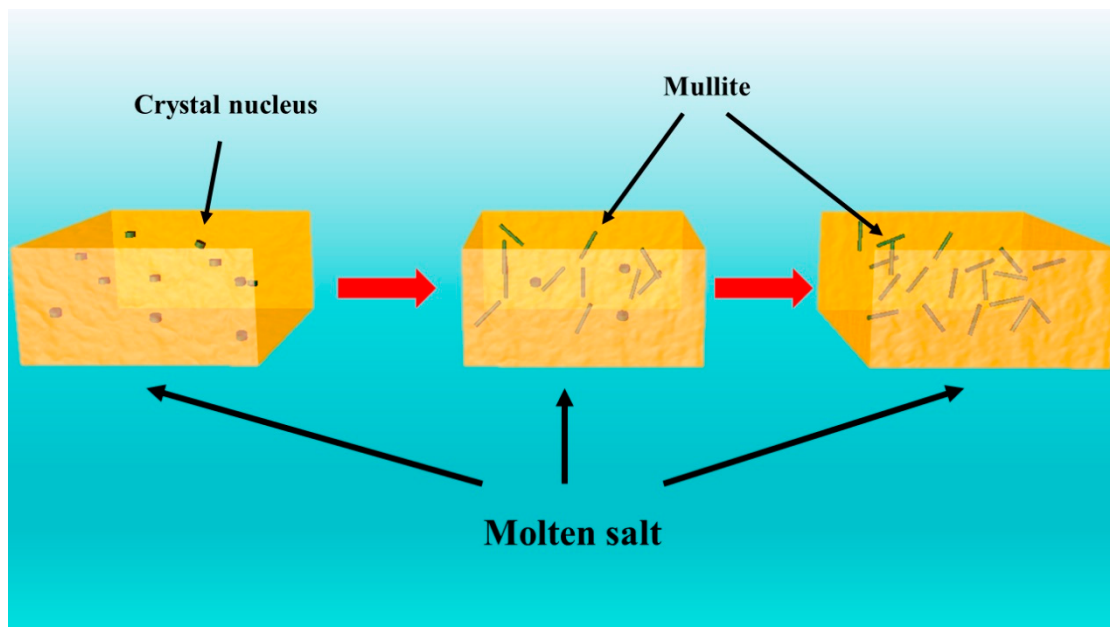

**Figure S2.** Mullite growth principle.

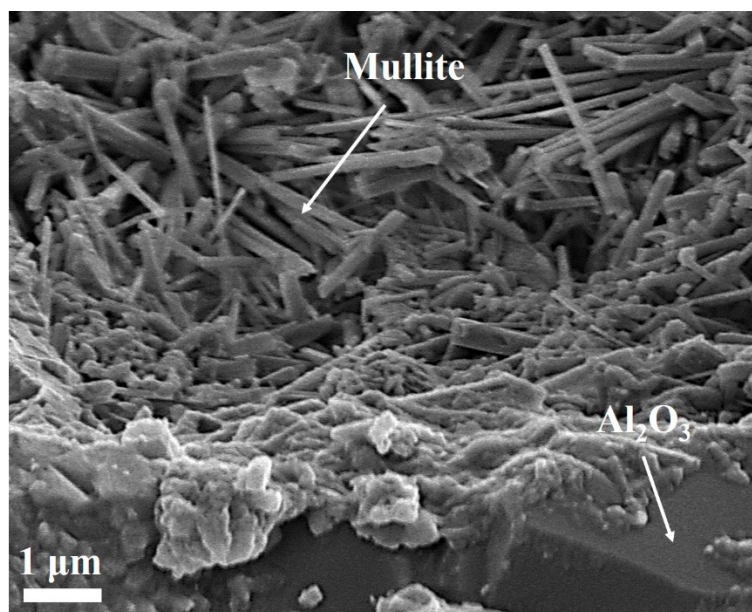

Figure S3. SEM cross-sectional image of S3 sample.

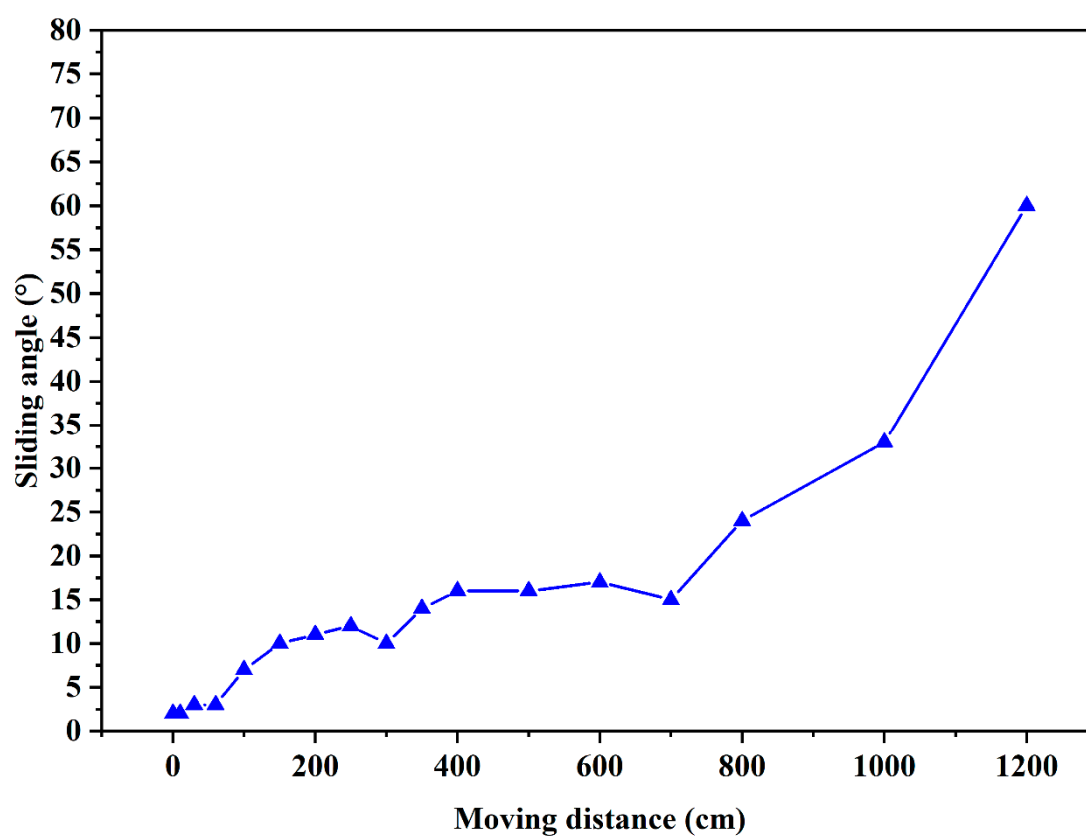

Figure S4. the effect of A1 sample moving distance on the sandpaper on the sliding angle.

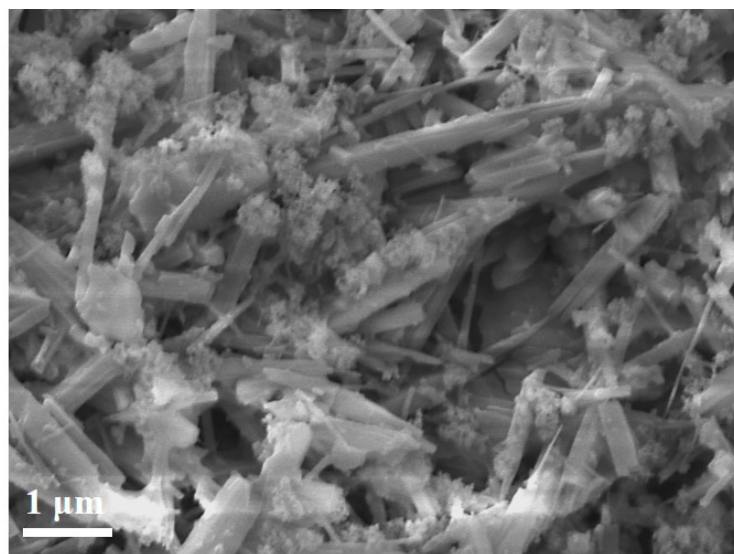

**Figure S5.** SEM morphology of A1 sample after 1200 cm abrasion test.
